# Supplementary material for: Synergistic effects of azobenzene and thiourea backbones in multiresponsive copolymers for sensing and adhesive technologies
Source: Royal Society of Chemistry journal article supplement (doi:10.1039/d4sm01536c), 2025-01-01
Supplement: d4sm01536c1.pdf [file d4sm01536c1.pdf]

## Supporting Information

### **Synergistic Effects of Azobenzene and Thiourea Backbones in Multiresponsive Copolymers for Sensing and Adhesive Technologies**

Tse-Yu Lo,<sup>1</sup> Mei-Li Li,<sup>1</sup> Chia-Wei Chang,<sup>1</sup> Tsung-Hung Tsai,<sup>1</sup> Heng-Hsuan Su,<sup>1</sup> Chun-Chi Chang,<sup>1</sup> Yen-Shen Hsu,<sup>1</sup> Huan-Wei Lin,<sup>1</sup> and Jiun-Tai Chen<sup>1,2\*</sup>

<sup>1</sup>Department of Applied Chemistry, National Yang Ming Chiao Tung University, Hsinchu,  
Taiwan 300093

<sup>2</sup>Center for Emergent Functional Matter Science, National Yang Ming Chiao Tung University,  
Hsinchu, Taiwan 300093

\*To whom correspondence should be addressed. E-mail: jtchen@nycu.edu.tw. Tel.: +886-3-5731631

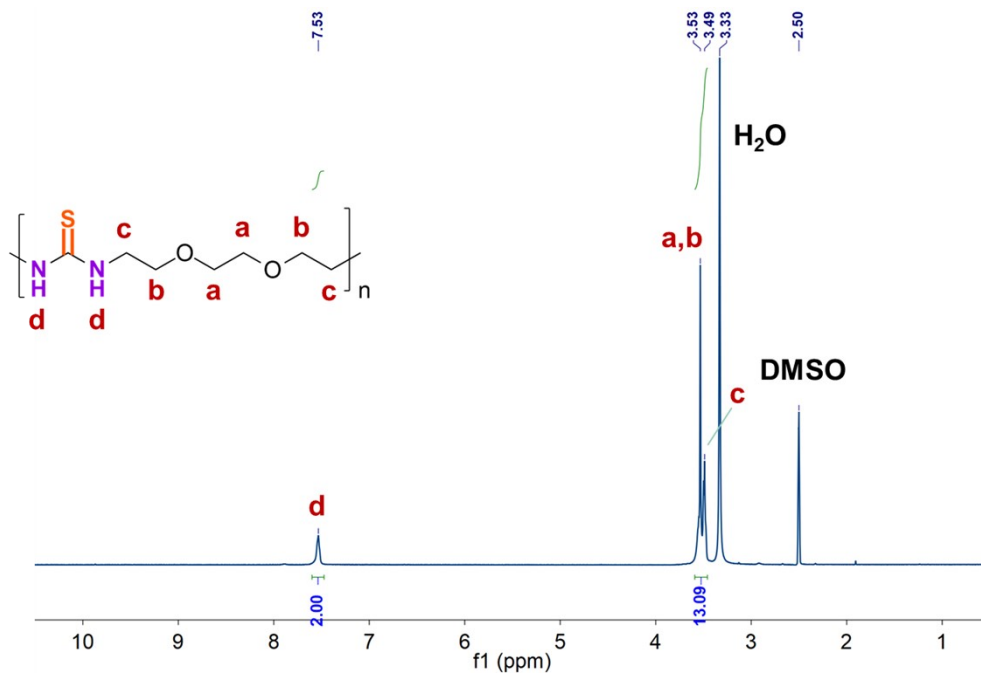

Figure S1. <sup>1</sup>H-NMR spectrum of PTUEG<sub>3</sub>.

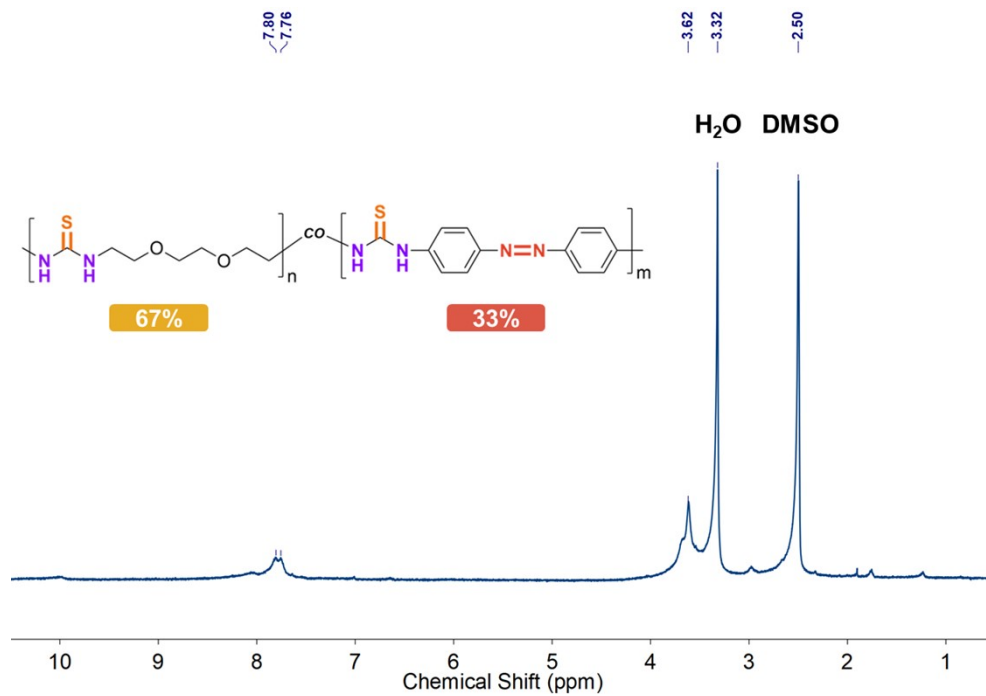

Figure S2. <sup>1</sup>H-NMR spectrum of PTUEG<sub>3</sub>-co-Azo 2:1

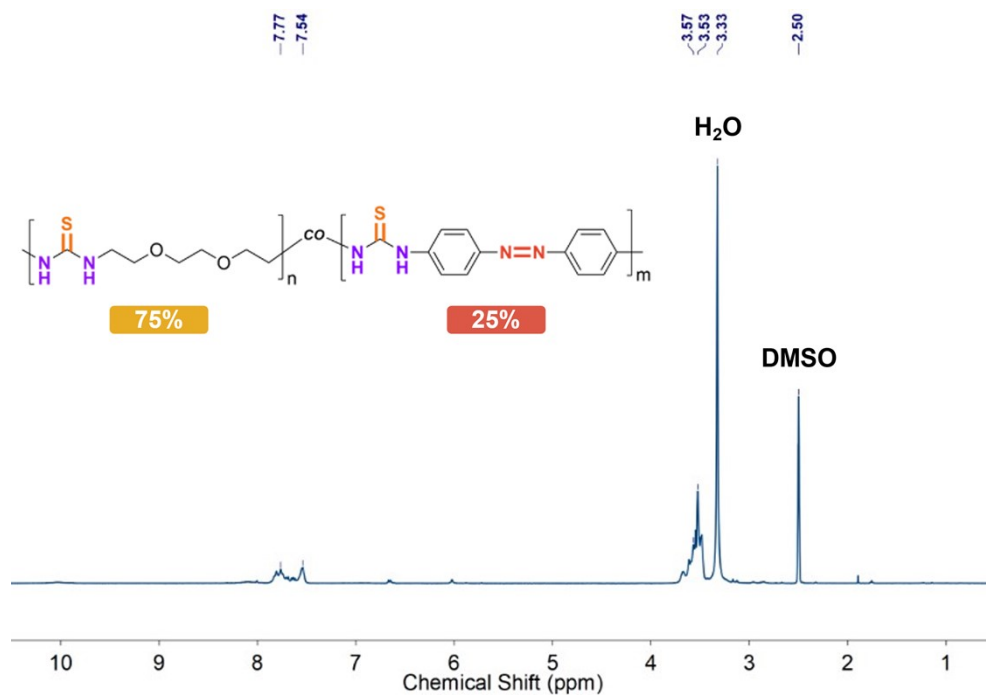

**Figure S3.** <sup>1</sup>H-NMR spectrum of PTUEG<sub>3</sub>-co-Azo 3:1

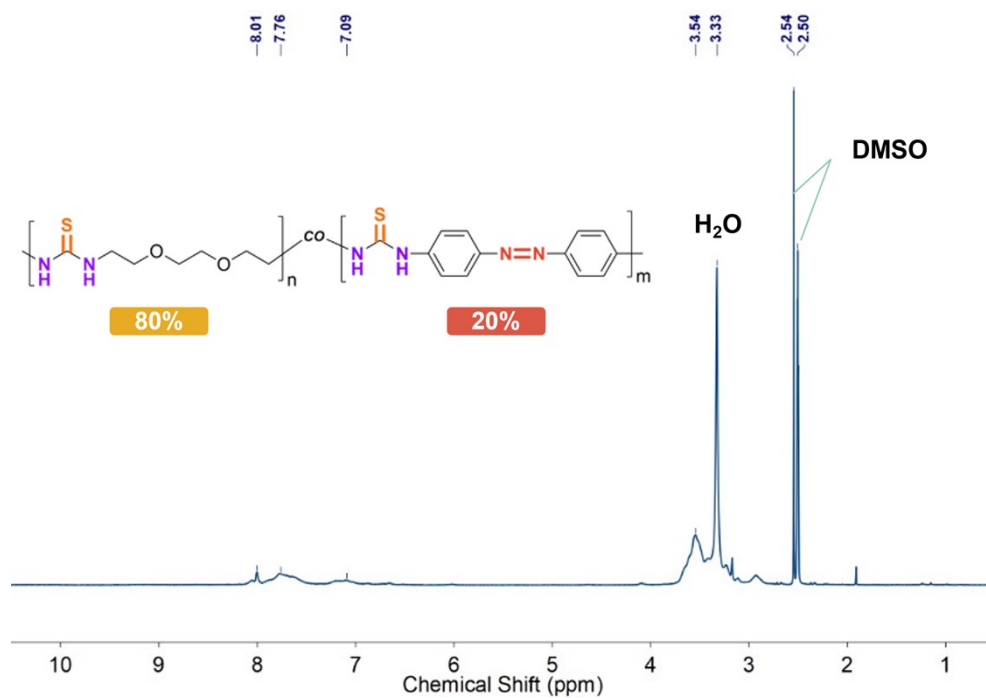

**Figure S4.** <sup>1</sup>H-NMR spectrum of PTUEG<sub>3</sub>-co-Azo 4:1

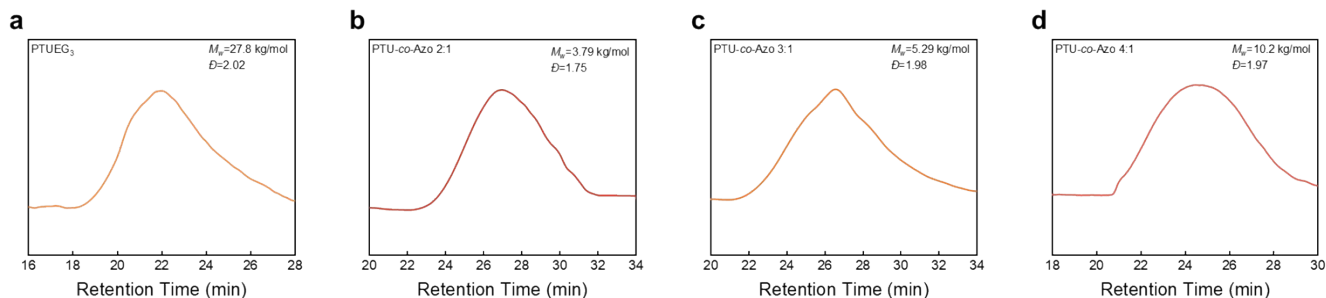

**Figure S5.** (a–c) GPC curves of PTUEG<sub>3</sub>-*co*-Azo copolymers with different DA:Azo ratios (2:1, 3:1, and 4:1).

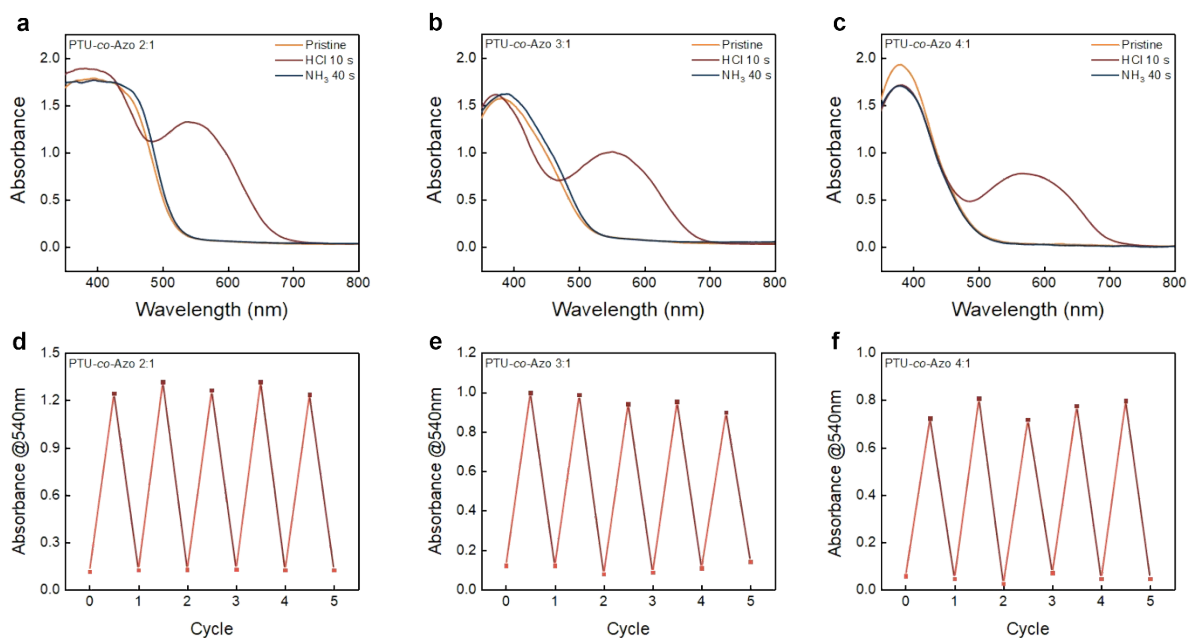

**Figure S6.** (a–c) UV–vis absorption spectra of PTUEG<sub>3</sub>-*co*-Azo films with different TUEG-DA:Azo-DA ratios (2:1, 3:1, and 4:1) upon exposure to HCl vapors (10 s) and NH<sub>3</sub> vapors (40 s). (d–f) Plots of the absorption intensities at 540 nm for PTUEG<sub>3</sub>-*co*-Azo films with different TUEG-DA:Azo-DA ratios (2:1, 3:1, and 4:1) during cycles of exposure to HCl vapors (10 s) and NH<sub>3</sub> vapors (40 s).
